# Supplementary material for: Spatiotemporal Evolution Characteristics and the Climatic Response of Carbon Sources and Sinks in the Chinese Grassland Ecosystem from 2010 to 2020
Source: MDPI journal article supplement (doi:10.3390/su14148461), 2022-07-11
Supplement: s1 [file s1]

# Supplementary Materials

## Vegetation Production Model

Based on the concept that leaves and canopy can be divided into chlorophyll and non-photosynthetic vegetation, the vegetation production model (VPM) divides the proportion of photosynthetic effective radiation absorbed by vegetation canopy into the chlorophyll absorption part ( $FPAR_{chl}$ ) and non-photosynthetic vegetation absorption part, and only the former is used for photosynthesis [1,2]. Therefore, the VPM can be expressed by the actual efficiency of utilization of light multiplied by the photosynthetic effective radiation absorbed by chlorophyll:

$$GPP = \varepsilon \times PAR \times FPAR_{chl}$$

where  $\varepsilon$  is the actual efficiency of utilization of light;  $PAR$  is photosynthetic active radiation and  $FPAR_{chl}$  is the effective proportion of photosynthetic radiation absorbed by chlorophyll.

$$FPAR_{chl} = (EVI - 0.1) \times 1.25$$

where  $EVI$  is an enhanced vegetation index.

$$\varepsilon = \varepsilon_{max} \times T_{scalar} \times W_{scalar} \times P_{scalar}$$

where  $\varepsilon_{max}$  is the maximum efficiency of utilization of light, the  $\varepsilon_{max}$  of the GE is  $0.42 \text{ g CM} \cdot \text{J}^{-1}$ ;  $T_{scalar}$  is a temperature stress factor;  $W_{scalar}$  is a water stress factor and  $P_{scalar}$  is the coefficient of regulation of leaf phenophase on maximum efficiency of utilization of light.

$$T_{scalar} = \frac{(T - T_{min})(T - T_{max})}{(T - T_{min})(T - T_{max}) - (T - T_{opt})^2}$$

where  $T$  is the temperature, and  $T_{min}$ ,  $T_{max}$  and  $T_{opt}$  are the lowest temperature, highest temperature and best temperature, respectively. The lowest, highest and best temperatures of the GE are 0, 48 and  $27^\circ\text{C}$ , respectively [3].

$W_{scalar}$  indicates the effect of water on photosynthesis. In the VPM, the water-sensitive land surface water index ( $LSWI$ ) is used for calculation. The formula for calculating the  $W_{scalar}$  is:

$$W_{scalar} = \frac{1 + LSWI}{1 + LSWI_{max}}$$

where  $LSWI_{max}$  is the maximum surface water content index.

$P_{scalar}$  indicates the effect of leaf age on photosynthesis at the canopy scale. In this study, the GE continues to have vegetation with new leaves throughout the growing season, so  $P_{scalar}$  was set to 1.0 [4].

## References

1. Xiao, X.M.; Zhang, Q.Y.; Braswell, B.; Urbanski, S.; Boles, S.; Wofsy, S.; Berrien, M.; Ojima, D. Modeling gross primary production of temperate deciduous broadleaf forest using satellite images and climate data. *Remote Sensing of Environment* **2004**, *91*, 256-270.
2. Xiao, X.; Hollinger, D.; Aber, J.; Goltz, M.; Davidson, E.A.; Zhang, Q.; Ill, B.M. Satellite-based modeling of gross primary production in an evergreen needleleaf forest. *Remote Sensing of Environment* **2004**, *89*, 519-534.
3. Raich, J.W.; Rastetter, E.B.; Melillo, J.M.; Kicklighter, D.W.; Steudler, P.A.; Peterson, B.J.; Grace, A.L.; Moore, B.; Vorosmarty, C.J. Potential net primary productivity in South America: Application of a global model. *Ecological Applications* **1991**, *1*, 399-429.
4. Chen, J.Q.; Yan, H.M.; Wang, S.Q.; Gao, Y.N.; Huang, M.; Wang, J.B.; Xiao, X.M. Estimation of gross primary productivity in Chinese terrestrial ecosystems by using VPM model. *Quaternary Sciences* **2014**, *34*, 732-742.
