# Supplementary material for: Spatiotemporal Evolution Characteristics and the Climatic Response of Carbon Sources and Sinks in the Chinese Grassland Ecosystem from 2010 to 2020
Source: MDPI journal article supplement (doi:10.3390/su14148461), 2022-07-11
Supplement: s1 [file s1]

Archive with 1 entries (1 files):
- sustainability-1807533-supplementary.pdf
